# Supplementary material for: Cloning and Characterization of Chitin Deacetylase from Euphausia superba
Source: MDPI journal article supplement (doi:10.3390/ijms25042075), 2024-02-08
Supplement: s1 [file s1]

# Supplemental material

## Supplemental Figure:

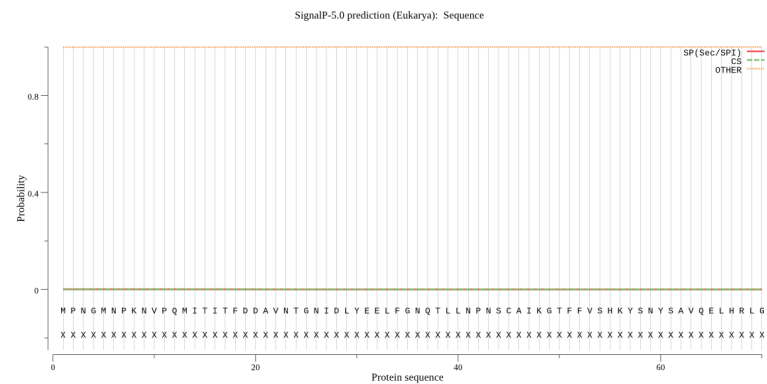

Figure S1. Signal peptide analysis.

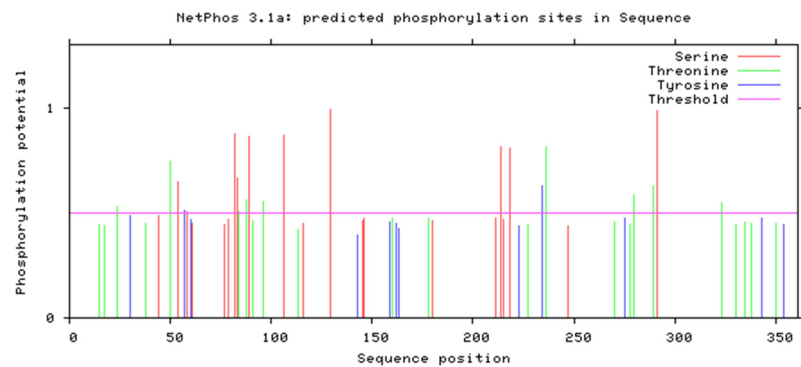

Figure S2. Phosphorylation site analysis.

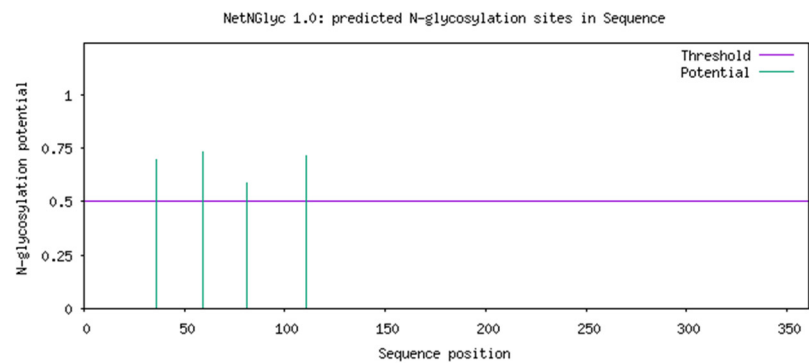

Figure S3. Glycosylation site analysis.

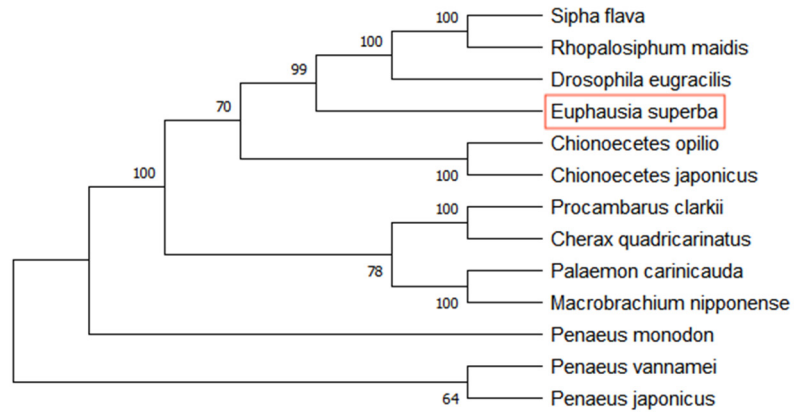

**Figure S4.** The phylogenetic tree constructed according to the sequences of *EsCDA* and other CDA. *EsCDA* researched in this study is in red box.

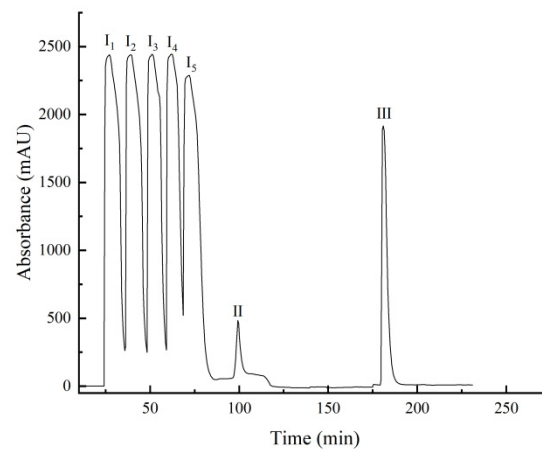

**Figure S5.** Ion exchange chromatography absorption peak.

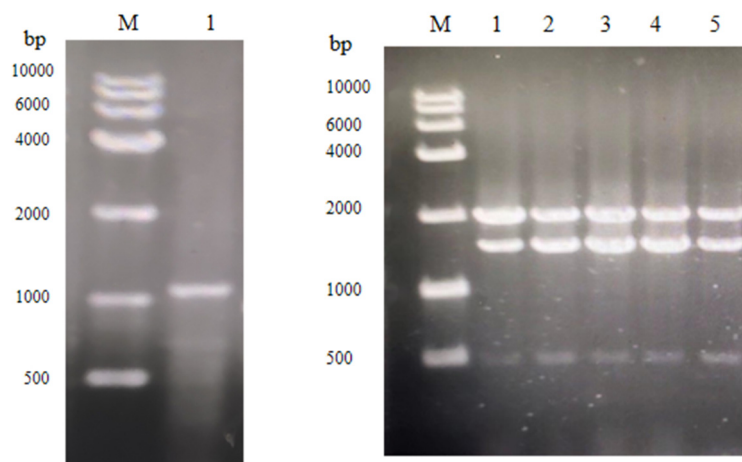

A

B

**Figure S6.** Results of agarose gel electrophoresis. A: Amplification analysis of the CDA genes.

Lane M: DNA marker; Lane 1: PCR amplification product. B: Colony PCR products for verification of DH5 $\alpha$  transformants of *EsCDA*. Lane M: DNA marker; Lane 1-5: Positive colony PCR products of DH5 $\alpha$  transformants of *EsCDA*, including *EsCDA* genes and partial expression vector (pPIC9K universal primers: 5'AOX I and 3'AOX I; 2000bp: AOX 1 gene in the GS115 genome; 1600bp: target gene+pPIC9K part gene; 500bp: dimer formed during the PCR process)

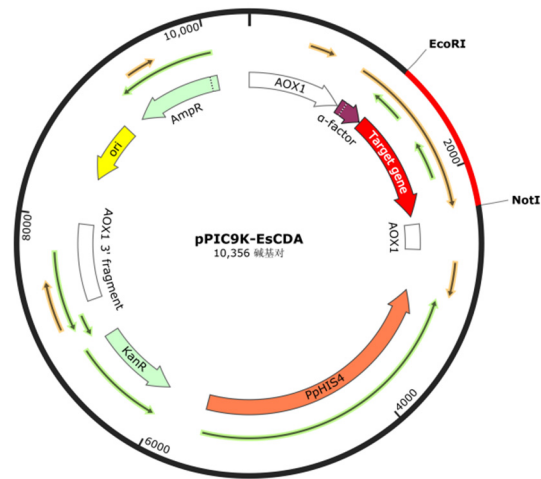

**Figure S7.** Construction of recombinant plasmid pPIC9K-*EsCDA*.

# Supplemental Table:

**Table S1.** The biochemical properties of different chitin deacetylases.

| Strain                            | Optimum temperature / °C | Optimum pH | Molecular Weight / kDa | Reference |
|-----------------------------------|--------------------------|------------|------------------------|-----------|
| <i>Absidia coerulea</i>           | 50                       | 5          | 75                     | 19        |
| <i>Saccharomyces cerevisiae</i>   | 50                       | 8          | 43                     | 21        |
| <i>Scopulariopsis brevicaulis</i> | 55                       | 7.5        | 55                     | 22        |
| <i>Rhizopus circinans</i>         | 37                       | 6          | 75                     | 23        |
| <i>Mortierella sp. DY-52</i>      | 60                       | 5.5        | 50                     | 24        |
| <i>Aspergillus nidulans</i>       | 50                       | 7          | 27                     | 36        |
| <i>Metarhizium anisopliae</i>     | -                        | 8.9        | 70                     | 38        |
| <i>Saccharomyces cerevisiae</i>   | 50                       | 7          | 34                     | 45        |
| <i>Coprinopsis cinerea</i>        | 70                       | 7.0        | 28                     | 46        |

**Table S2.** Mutation PCR reaction system.

| Reagent                                   | Sample volume (μL) |
|-------------------------------------------|--------------------|
| Q5 Hot Start High-Fidelity DNA Polymerase | 12.5               |
| forward primer                            | 1                  |
| reverse primer                            | 1                  |
| template DNA                              | 1                  |
| nuclease-free water                       | 9.5                |

**Table S3.** Primers used in mutagenesis.

| Mutation | Sequence (5'-3')              |
|----------|-------------------------------|
| F18G-F   | TACCATTACCGGTGACGACGCCG       |
| F18G-R   | ATCATTTGGGGCACGTTC            |
| R121D-F  | TATTGGTATGGATGCTCCATTTAACAGAG |
| R121D-R  | ATGGATTGGTCAGTAATG            |
| F124G-F  | GAGAGCTCCAGGTAACAGAGTTGG      |
| F124G-R  | ATACCAATAATGGATTGGTC          |
| Q246H-F  | TTTGTTTTTTCAITCTGCTTTTTTGAAG  |
| Q246H-R  | CCAAGTGGTGCTCTATTAG           |
